# Supplementary material for: Prophages and Growth Dynamics Confound Experimental Results with Antibiotic-Tolerant Persister Cells
Source: PubMed Central journal article supplement (PMC5727415; doi:10.1128/mbio.01964-17), 2017-12-12

**A**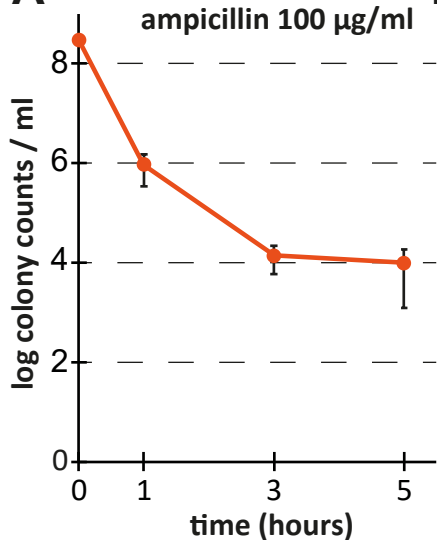**B**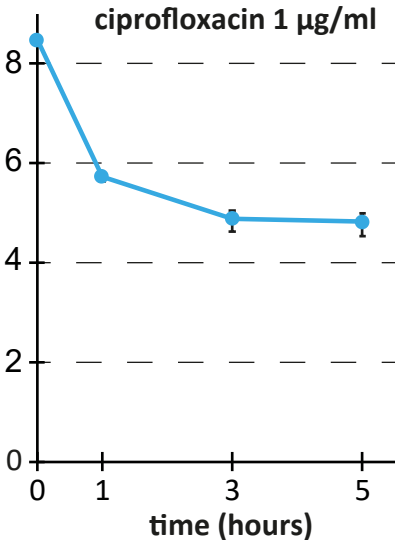**C**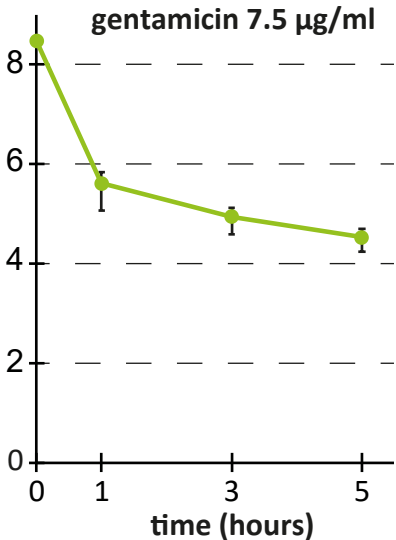

Supplement: mbo006173637sf2.pdf [file mbo006173637sf2.pdf]
