# Supplementary material for: Prophages and Growth Dynamics Confound Experimental Results with Antibiotic-Tolerant Persister Cells
Source: PubMed Central journal article supplement (PMC5727415; doi:10.1128/mbio.01964-17), 2017-12-12

ciprofloxacin 1  $\mu\text{g}/\text{ml}$

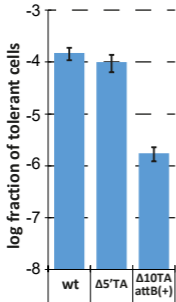

Supplement: mbo006173637sf4.pdf [file mbo006173637sf4.pdf]
