# Supplementary material for: Prophages and Growth Dynamics Confound Experimental Results with Antibiotic-Tolerant Persister Cells
Source: PubMed Central journal article supplement (PMC5727415; doi:10.1128/mbio.01964-17), 2017-12-12
Supplement: mbo006173637st1.pdf [file mbo006173637st1.pdf]

1 **Table S1. List of all strains used in this study.**

| Strain                          | Genotype*                                                                                                                                                                                                                | Source / Description / Construction                                                                                                                              |
|---------------------------------|--------------------------------------------------------------------------------------------------------------------------------------------------------------------------------------------------------------------------|------------------------------------------------------------------------------------------------------------------------------------------------------------------|
| <i>E. coli</i> K-12 MG1655      | F <sup>-</sup> λ <sup>-</sup> <i>ilvG</i> <sup>-</sup> <i>rfb-50 rph-1</i>                                                                                                                                               | our laboratory collection; K-12 wildtype strain                                                                                                                  |
| ... Δ1TA                        | K-12 MG1655 Δ <i>chpB</i> λ <sub>def</sub> (+)                                                                                                                                                                           | also known as SC31 (originally from S. K. Christensen, et al. (1)); used by E. Maisonneuve, et al. (2)                                                           |
| ... Δ2TA                        | K-12 MG1655 Δ <i>mazF</i> Δ <i>chpB</i> λ <sub>def</sub> (+)                                                                                                                                                             | also known as SC301 (originally from S. K. Christensen, et al. (3)); used by E. Maisonneuve, et al. (2)                                                          |
| ... Δ3TA                        | K-12 MG1655 Δ <i>mazF</i> Δ <i>chpB</i> Δ <i>relBE</i> λ <sub>def</sub> (+)                                                                                                                                              | also known as SC3410 (originally from S. K. Christensen, et al. (3)); used by E. Maisonneuve, et al. (2)                                                         |
| ... Δ4TA                        | K-12 MG1655 Δ <i>mazF</i> Δ <i>chpB</i> Δ <i>relBE</i> Δ <i>dinJ-yafQ</i> λ <sub>def</sub> (+)                                                                                                                           | also known as SC30146 (originally from S. K. Christensen, et al. (3)); used by E. Maisonneuve, et al. (2)                                                        |
| ... Δ5TA                        | K-12 MG1655 Δ <i>mazF</i> Δ <i>chpB</i> Δ <i>relBE</i> Δ <i>dinJ-yafQ</i> Δ <i>yefM-yoeB</i> λ <sub>def</sub> (+) φ80(+)                                                                                                 | also known as SC301467 (originally from S. K. Christensen, et al. (3)); used by E. Maisonneuve, et al. (2)                                                       |
| ... Δ6TA                        | K-12 MG1655 Δ <i>mazF</i> Δ <i>chpB</i> Δ <i>relBE</i> Δ <i>dinJ-yafQ</i> Δ <i>yefM-yoeB</i> Δ <i>higBA</i> λ <sub>def</sub> (+) φ80(+)                                                                                  | also known as MGJ59; constructed and used by E. Maisonneuve, et al. (2)                                                                                          |
| ... Δ7TA                        | K-12 MG1655 Δ <i>mazF</i> Δ <i>chpB</i> Δ <i>relBE</i> Δ <i>dinJ-yafQ</i> Δ <i>yefM-yoeB</i> Δ <i>higBA</i> Δ <i>prf-yhaV</i> λ <sub>def</sub> (+) φ80(+)                                                                | also known as MGJ598; constructed and used by E. Maisonneuve, et al. (2)                                                                                         |
| ... Δ8TA                        | K-12 MG1655 Δ <i>mazF</i> Δ <i>chpB</i> Δ <i>relBE</i> Δ <i>dinJ-yafQ</i> Δ <i>yefM-yoeB</i> Δ <i>higBA</i> Δ <i>prf-yhaV</i> Δ <i>yafNO</i> λ <sub>def</sub> (+) φ80(+)                                                 | also known as MGJ5987; constructed and used by E. Maisonneuve, et al. (2)                                                                                        |
| ... Δ9TA                        | K-12 MG1655 Δ <i>mazF</i> Δ <i>chpB</i> Δ <i>relBE</i> Δ <i>dinJ-yafQ</i> Δ <i>yefM-yoeB</i> Δ <i>higBA</i> Δ <i>prf-yhaV</i> Δ <i>yafNO</i> Δ <i>mqsRA</i> λ <sub>def</sub> (+) φ80(+) φ80h(80)imm(λ)(+)                | also known as MGJ59876; constructed and used by E. Maisonneuve, et al. (2)                                                                                       |
| ... Δ10TA                       | K-12 MG1655 Δ <i>mazF</i> Δ <i>chpB</i> Δ <i>relBE</i> Δ <i>dinJ-yafQ</i> Δ <i>yefM-yoeB</i> Δ <i>higBA</i> Δ <i>prf-yhaV</i> Δ <i>yafNO</i> Δ <i>mqsRA</i> Δ <i>hicAB</i> λ <sub>def</sub> (+) φ80(+) φ80h(80)imm(λ)(+) | also known as EJM43; constructed and used by E. Maisonneuve, et al. (2)                                                                                          |
| ... Δ10 TA <i>attB</i> (+)      | K-12 MG1655 Δ <i>mazF</i> Δ <i>chpB</i> Δ <i>relBE</i> Δ <i>dinJ-yafQ</i> Δ <i>yefM-yoeB</i> Δ <i>higBA</i> Δ <i>prf-yhaV</i> Δ <i>yafNO</i> Δ <i>mqsRA</i> Δ <i>hicAB</i> φ80(+) φ80h(80)imm(λ)(+)                      | this study; Δ10TA in which the defective lambda prophage had been cured (see <i>STAR Methods</i> )                                                               |
| ... Δ5' TA                      | K-12 MG1655 Δ <i>hicAB::FRT</i> Δ <i>mqsR::FRT</i> Δ <i>yafO::FRT</i> Δ <i>yhaV::FRT</i> Δ <i>higB::FRT</i>                                                                                                              | also known as EJM46789; constructed and used by E. Maisonneuve, et al. (2)                                                                                       |
| ... Δ10' TA                     | K-12 MG1655 Δ <i>hicAB::FRT</i> Δ <i>mqsR::FRT</i> Δ <i>yafO::FRT</i> Δ <i>yhaV::FRT</i> Δ <i>higB::FRT</i> Δ <i>yefM-yoeB</i> Δ <i>dinJ-yafQ</i> Δ <i>relBE</i> Δ <i>chpBS</i> Δ <i>mazF</i>                            | this study; also known as AHK250                                                                                                                                 |
| ... λ(+)                        | K-12 MG1655 <i>lamB</i> λ(+)                                                                                                                                                                                             | also called JMT1; single lambda lysogen of S. Semsey, et al. (4)                                                                                                 |
| ... φ80(+)                      | K-12 MG1655 φ80(+)                                                                                                                                                                                                       | this study; also called AHK031; K-12 MG1655 wildtype lysogenized with φ80 from culture supernatant of Δ10TA <i>attB</i> (+)                                      |
| ... <i>lamB</i>                 | K-12 MG1655 <i>lamB::camR</i>                                                                                                                                                                                            | obtained from Sine Lo Svenningsen                                                                                                                                |
| ... <i>fhuA</i>                 | K-12 MG1655 <i>fhuA::kanR</i>                                                                                                                                                                                            | this study; <i>fhuA::kanR</i> allele transduced from the KEIO collection (5)                                                                                     |
| ... <i>relA spoT</i> (original) | K-12 MG1655 <i>relA::kanR(251) spoT::cat(207) λ(+)</i> φ80(+)                                                                                                                                                            | also called CF1693 (originally from H. Xiao, et al. (6)); used by E. Maisonneuve, et al. (7) as stock EJM48; no indication that the lambda prophage is defective |
| ... <i>relA spoT</i> (new)      | K-12 MG1655 <i>relA::FRT spoT::cat(207)</i>                                                                                                                                                                              | this study; also called PDC47                                                                                                                                    |
| ... <i>lon</i>                  | K-12 MG1655 <i>lon::tetR</i>                                                                                                                                                                                             | our laboratory collection; used by E. Maisonneuve, et al. (7)                                                                                                    |
| ... <i>sulA</i>                 | K-12 MG1655 <i>sulA::kanR</i>                                                                                                                                                                                            | constructed and used by E. Maisonneuve, et al. (7)                                                                                                               |
| ... <i>sulA</i> Δ <i>lon</i>    | K-12 MG1655 <i>sulA::FRT</i> Δ <i>lon</i>                                                                                                                                                                                | this study; also called AHK173                                                                                                                                   |
| ... Δ <i>ppk-ppx</i> (old)      | K-12 MG1655 Δ <i>ppk ppx::kanR</i> φ80(+)                                                                                                                                                                                | also called CF5802 (originally from A. Kuroda, et al. (8)), used by E. Maisonneuve, et al. (7) as EJM47                                                          |
| ... Δ <i>ppk-ppx</i> (new)      | K-12 MG1655 Δ <i>ppk-ppx</i>                                                                                                                                                                                             | this study; also known as AHK062                                                                                                                                 |
| BW25113                         | K-12 MG1655 F <sup>-</sup> Δ( <i>araD-araB</i> )567 Δ <i>lacZ4787::rrnB-3</i> λ <sup>-</sup> <i>rph-1</i> Δ( <i>rhaD-rhaB</i> )568 <i>hsdR514</i>                                                                        | our laboratory collection; commonly used lab strain derivative of K-12 MG1655                                                                                    |
| Δ9CP                            | BW25113 Δ <i>rac</i> Δ <i>CP4-57</i> Δ <i>CP5-53</i> Δ <i>DLP12</i> Δ <i>Qin</i> Δ <i>14</i> Δ <i>CP4-6</i> Δ <i>CPZ-55</i> Δ <i>CP4-44</i> Δ <i>kanR</i>                                                                | derivative of BW25113 lacking all nine cryptic prophages; constructed by X. Wang, et al. (9)                                                                     |
| HME71                           | W3110 <i>galK<sub>tyr145UAG</sub></i> Δ <i>lacU169</i> [λ <i>cl857</i> Δ( <i>cro-bioA</i> )] Δ( <i>srlA-recA</i> )301::Tn10                                                                                              | our laboratory collection; <i>E. coli</i> K-12 stain carrying the temperature-sensitive λRED prophage; constructed by J. A. Sawitzke, et al. (10)                |

|                                 |                                                                                                                                                                                 |                                                                                                          |
|---------------------------------|---------------------------------------------------------------------------------------------------------------------------------------------------------------------------------|----------------------------------------------------------------------------------------------------------|
| MAS889                          | W3110 <i>galK<sub>tyr145UAG</sub> ΔlacU169</i> [ $\lambda$ cl857 $\Delta$ ( <i>cro-bioA</i> )] <i>srl<sup>+</sup> rec<sup>+</sup> tet<sup>S</sup></i>                           | this study; derivative of HME71 cured for the $\Delta$ ( <i>srlA-recA</i> )301:: <i>Tn10</i> ) insertion |
| MAS242                          | K-12 MG1655 $\Delta$ ( <i>proAB-lac</i> ) <i>cys Ilv(val<sup>R</sup>) str<sup>R</sup> thi mini-Tn10</i> close to <i>galE</i>                                                    | our laboratory collection                                                                                |
| MAS902                          | W3110 <i>galK<sub>tyr145UAG</sub> ΔlacU169</i> [ $\lambda$ cl857 $\Delta$ ( <i>cro-bioA</i> )] <i>srl<sup>+</sup> rec<sup>+</sup> tet<sup>S</sup> tn10</i> close to <i>galE</i> | this study; <i>tn10</i> close to <i>galE</i> transduced from MAS242 into MAS889                          |
| <b>Bacteriophages</b>           |                                                                                                                                                                                 |                                                                                                          |
| T4D                             | wildtype strain                                                                                                                                                                 | obtained from Kenneth Kreutzer                                                                           |
| $\phi$ 80 <i>vir</i>            | obligately lytic mutant of $\phi$ 80                                                                                                                                            | obtained from Sine Lo Svenningsen                                                                        |
| lambda <i>Cl<sub>b221</sub></i> | obligately lytic mutant of lambda ( <i>cl</i> mutant)                                                                                                                           | our laboratory collection                                                                                |

1 \* newly discovered genotypic features of previously published strains are highlighted in bold font; the defective lambda  
2 prophage of some strains is indicated as  $\lambda_{def}$

3

#### 4 **References cited in Table S1**

- 5 1. **Christensen SK, Pedersen K, Hansen FG, Gerdes K.** 2003. Toxin-antitoxin loci as stress-response-  
6 elements: ChpAK/MazF and ChpBK cleave translated RNAs and are counteracted by tmRNA. *J Mol Biol*  
7 **332**:809-819.
- 8 2. **Maisonneuve E, Shakespeare LJ, Jørgensen MG, Gerdes K.** 2011. Bacterial persistence by RNA  
9 endonucleases. *Proc Natl Acad Sci U S A* **108**:13206-13211.
- 10 3. **Christensen SK, Maenhaut-Michel G, Mine N, Gottesman S, Gerdes K, Van Melderen L.** 2004.  
11 Overproduction of the Lon protease triggers inhibition of translation in *Escherichia coli*: involvement of  
12 the *yefM-yoeB* toxin-antitoxin system. *Mol Microbiol* **51**:1705-1717.
- 13 4. **Semsey S, Champion C, Mohamed A, Svenningsen SL.** 2015. How long can bacteriophage  $\lambda$  change its  
14 mind? *Bacteriophage* **5**:e1012930.
- 15 5. **Baba T, Ara T, Hasegawa M, Takai Y, Okumura Y, Baba M, Datsenko KA, Tomita M, Wanner BL, Mori**  
16 **H.** 2006. Construction of *Escherichia coli* K-12 in-frame, single-gene knockout mutants: the Keio  
17 collection. *Mol Syst Biol* **2**:2006 0008.
- 18 6. **Xiao H, Kalman M, Ikehara K, Zemel S, Glaser G, Cashel M.** 1991. Residual guanosine 3',5'-  
19 bispyrophosphate synthetic activity of *relA* null mutants can be eliminated by *spoT* null mutations. *J Biol*  
20 *Chem* **266**:5980-5990.

- 1 7. **Maisonneuve E, Castro-Camargo M, Gerdes K.** 2013. (p)ppGpp controls bacterial persistence by  
2 stochastic induction of toxin-antitoxin activity. *Cell* **154**:1140-1150.
- 3 8. **Kuroda A, Murphy H, Cashel M, Kornberg A.** 1997. Guanosine tetra- and pentaphosphate promote  
4 accumulation of inorganic polyphosphate in *Escherichia coli*. *J Biol Chem* **272**:21240-21243.
- 5 9. **Wang X, Kim Y, Ma Q, Hong SH, Pokusaeva K, Sturino JM, Wood TK.** 2010. Cryptic prophages help  
6 bacteria cope with adverse environments. *Nat Commun* **1**:147.
- 7 10. **Sawitzke JA, Thomason LC, Costantino N, Bubunenko M, Datta S, Court DL.** 2007. Recombineering: *in*  
8 *vivo* genetic engineering in *E. coli*, *S. enterica*, and beyond. *Methods Enzymol* **421**:171-199.

9
