# Supplementary material for: Prophages and Growth Dynamics Confound Experimental Results with Antibiotic-Tolerant Persister Cells
Source: PubMed Central journal article supplement (PMC5727415; doi:10.1128/mbio.01964-17), 2017-12-12
Supplement: mbo006173637st2.pdf [file mbo006173637st2.pdf]

**Table S2. List of all oligonucleotide primers used in this study.**

| <i>Primer name</i> | <i>Sequence (5'-3')</i>                                                                |
|--------------------|----------------------------------------------------------------------------------------|
| prAH1465           | TCGTGTCATCTGATTACCTGGCGGAAATTAACCTAAGAGAGAGCTCTATGGGAACTTCATTTAAATGGCG                 |
| prAH1466           | TTTTTATTAGTGCATTTTGC GCGAGGTC ACTATTTG CAGT CACAACCTGGGTCCATATGAATATCCTCCTTAG          |
| prAH1469           | ATAATATCCAGGCAGTGTCCCGTGAATAAAACGGAGTAAAAGTGGTAATGGGAACTTCATTTAAATGGCG                 |
| prAH1470           | GCCGACATTTCTCGTCGGCCCGCAAAGTATTAAGCGGCGATTTCTGGTGTGGTCCATATGAATATCCTCCTTA<br>G         |
| prAH1491           | GGCAGTGTCCCGTGAATAAAACGGAGTAAAAGTGGTAATGACACCAGAAATCGCCGCTTAATACTTTGCGGG<br>CCGACGAG   |
| prAH1492           | CTCGTCGGCCCGCAAAGTATTAAGCGGCGATTTCTGGTGTCACTTACCCTTTACTCCGTTTTATTACGGGAC<br>ACTGCC     |
| prAH1493           | TGATTACCTGGCGGAAATTAACCTAAGAGAGAGCTCTATGCAGGTTGTACTGCAAATAGTGACCTCGCGC<br>AAAATGCA     |
| prAH1494           | TGCATTTTGC GCGAGGTC ACTATTTG CAGT CACAACCTGC ATAGAGCTCTCTTAGTTTAATTTCCGCCAGG<br>TAATCA |
| prAH1499           | CTTTGTGTCGGTGATCATTG                                                                   |
| prAH1500           | GAATAGCGAGCGTACCTTAG                                                                   |
| prAH1506           | GAAGTCTTTGCGCAGTATCAG                                                                  |
| prAH1521           | GGTCATTGAAGTCATAATCATTTC                                                               |
| prAH1626           | TGCCCCGATAAATAAACACACCTTATCCACCACCGCCTGCAAGCGTAAGGTCCATATGAATATCCTCCTTAG               |
| prAH1627           | AGCGGGCTTTACCCAAAGAGCGCCGCGTGAGTTCAGTTCTCTCAAATCGGGAACTTCATTTAAATGGCG                  |
| prAH1629           | AGAATAGAAGTGAGTTAGTAACACTACCCAATCAGTACGTTAATTTTGGCGGAACTTCATTTAAATGGCG                 |
| prAH1631           | AAACAGAGATGTCATGCTTTGGTTCCAGAGAATGCGTTTGACCGCCTCGCTGGAACCTTCATTTAAATGGCG               |
| prAH1633           | ATTCATTCTATGAATGAATCTGTTCAATAATGATAACGACATGCTGCAATGGAACCTTCATTTAAATGGCG                |
| prAH1648           | TGTTTTGTAATTCCTCACCTTTTGCTTTTCTCTCCGAGCCGCTTCCATGGAACTTCATTTAAATGGCG                   |
| prAH1649           | TCAATAATGGCTGGTCATGCTTTAATGTTGCAGTGTATCCCGGATCGTTTGGTCCATATGAATATCCTCCTTAG             |
| prAH1650           | TCCACGAGAATATCGACTGGGGAGAGCCGAAAGATAAGGAAGTCTGGTAAGGTCCATATGAATATCCTCCTT<br>AG         |
| prAH1651           | CTTAGCAATGGCTGCTCCTGGCACAAAGCGGACAGTGATCACCGTTCTTAGGTCCATATGAATATCCTCCTTA<br>G         |
| prAH1652           | CTGATGGCACCAAAAATAGCGAAGCCTGGATTTTCGTCTCACTGACAATAGGTCCATATGAATATCCTCCTTA<br>G         |
| prAH1653           | TGAATGAATCTGTTCAATAATGATAACGACATGCTGCAATTATTGTCACTGAGACGAAAATCCAGGCTTCGCT<br>ATTTTTG   |
| prAH1654           | CAAAAATAGCGAAGCCTGGATTTTCGTCTCACTGACAATAATTGCAGCATGTGTTATCATTATTGAACAGATT<br>CATTCA    |
| prAH1655           | GTCATGCTTTGGTTCCAGAGAATGCGTTTGACCGCCTCGCTTAAGAACGGTGATCACTGTCCGCTTTGTGCCAG<br>GAGCAGC  |
| prAH1656           | GCTGCTCCTGGCACAAAGCGGACAGTGATCACCGTTCTTAAGCGAGGCGGTCAAACGCATTCTCTGAACCAA<br>AGCATGAC   |
| prAH1657           | TGAGTTAGTAACACTACCCAATCAGTACGTTAATTTTGGCTTACCAGACTTCTTATCTTTGGCTCTCCCCAGT<br>CGATA     |
| prAH1658           | TATCGACTGGGGAGAGCCGAAAGATAAGGAAGTCTGGTAAGCCAAAATTAACGTAAGTATTGGGTAGTGT<br>ACTAACTCA    |
| prAH1659           | ACCCAAAGAGCGCCGCGTGAGTTCAGTTCTCTCAAATCGAAACGATCCGGGATACACTGCAACATTAAGC<br>ATGACCAG     |
| prAH1660           | CTGGTCATGCTTTAATGTTGCAGTGTATCCCGGATCGTTTCGATTTGAGAGAAGTGGAACTCACGCGGCGCTC<br>TTTGGGT   |

|          |                                                                                    |
|----------|------------------------------------------------------------------------------------|
| prAH1661 | TTCCCTCACCTTTTGCTTTTCTCTCCGAGCCGCTTCCATTTACGCTTGCAGGCGGTGGTGAATAAGGTGTGT<br>TTATTT |
| prAH1662 | AAATAAACACACCTTATTCCACCACCGCTGCAAGCGTAAATGGAAAGCGGCTCGGAGAGAAAAGCAAAG<br>GTGAGGGAA |
| prMASb2  | GTATGCATGCTGGGTGTGGGGAA                                                            |
| prMASbio | CTCTCTGGCAAGCGCCTCGATT                                                             |
| prMASgal | CCGACAGAATCGGGCGAGAAGA                                                             |
| prMASint | CGCGCACGAAAAGCATCAGGT                                                              |
